# Supplementary material
Source: Springer Nature journal article supplement (https://www.springermedizin.de/resource/supplementary/12879_2013_2443_MOESM1_ESM.pdf/9444590)
Supplement: MOESM1 [file 9444590]

Table 1: Socio-demographic and economic characteristics of the study participants comparing adherent and non-adherent in Tigray regional state, northern Ethiopia, 2012

| Characteristics of study participants | Status of adherence to ART        |                               |
|---------------------------------------|-----------------------------------|-------------------------------|
|                                       | Non-adherent to ART<br>Number (%) | Adherent to ART<br>Number (%) |
| <b>Sex</b>                            |                                   |                               |
| <b>Male</b>                           | 80(46)                            | 80(46)                        |
| <b>Female</b>                         | 94(54)                            | 94(54)                        |
| <b>Age</b>                            |                                   |                               |
| <b>18 – 29</b>                        | 23(13.2)                          | 23(13.2)                      |
| <b>30 – 39</b>                        | 72(41.4)                          | 71(40.8)                      |
| <b>40 – 49</b>                        | 67(38.5)                          | 66(38)                        |
| <b>≥50</b>                            | 12(6.9)                           | 14(8)                         |
| <b>Permanent address</b>              |                                   |                               |
| <b>Urban</b>                          | 156(89.7)                         | 159(91.4)                     |
| <b>Rural</b>                          | 18(10.3)                          | 15(8.6)                       |
| <b>Marital Status</b>                 |                                   |                               |
| <b>Single</b>                         | 38(21.8)                          | 39(22.4)                      |
| <b>Married</b>                        | 67(38.5)                          | 76(43.7)                      |
| <b>Widowed</b>                        | 38(21.8)                          | 43(24.7)                      |
| <b>Divorced</b>                       | 31(17.9)                          | 16(9.2)                       |
| <b>Educational status</b>             |                                   |                               |
| <b>No education</b>                   | 31(17.8)                          | 37(21.3)                      |
| <b>Elementary (1 - 8)</b>             | 94(54)                            | 58((33.3)                     |
| <b>Secondary (9 - 12)</b>             | 38(21.8)                          | 49(28.2)                      |
| <b>12+</b>                            | 11(6.4)                           | 30(17.2)                      |
| <b>Occupation</b>                     |                                   |                               |
| <b>Have no Job</b>                    | 26(14.9)                          | 44(25.3)                      |
| <b>Government employed</b>            | 42(24.2)                          | 46(26.4)                      |
| <b>Self employed/business</b>         | 54(31)                            | 36(20.7)                      |
| <b>Daily laborer</b>                  | 52(29.9)                          | 48(27.6)                      |

---

|                                             |           |           |
|---------------------------------------------|-----------|-----------|
| <b>Living With</b>                          |           |           |
| <b>Alone</b>                                | 67(38.5)  | 52(29.9)  |
| <b>Family</b>                               | 81(46.6)  | 84(48.3)  |
| <b>Parents</b>                              | 9(5.1)    | 9(5.1)    |
| <b>With others</b>                          | 17(9.8)   | 29(16.7)  |
| <b>Average Monthly income (Ethio. Birr)</b> |           |           |
| <b>No income</b>                            | 25(14.4)  | 26(14.9)  |
| <b>≤ 500</b>                                | 95(54.6)  | 65(37.4)  |
| <b>501-999</b>                              | 24(13.8)  | 31(17.8)  |
| <b>≥ 1000</b>                               | 30(17.2)  | 52(29.9)  |
| <b>Distance to hospital (Km)</b>            |           |           |
| <b>≤10</b>                                  | 112(64.4) | 130(74.7) |
| <b>&gt;10</b>                               | 62(35.6)  | 44(25.3)  |

---
